# Supplementary material for: Modelling the Structure and Dynamics of Biological Pathways
Source: PubMed Central journal article supplement (PMC4980033; doi:10.1371/journal.pbio.1002530), 2016-08-10

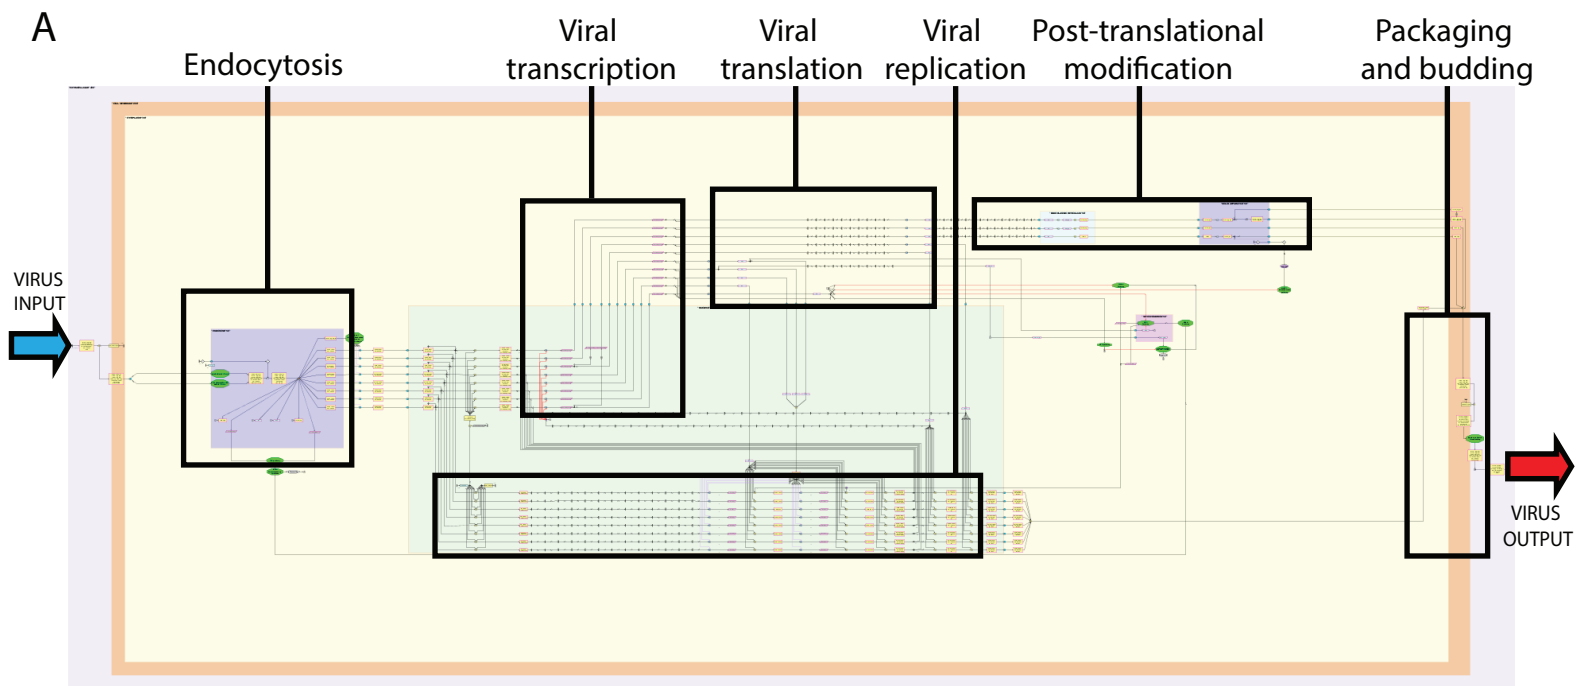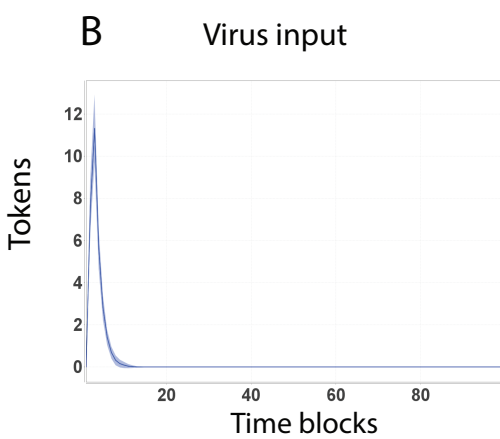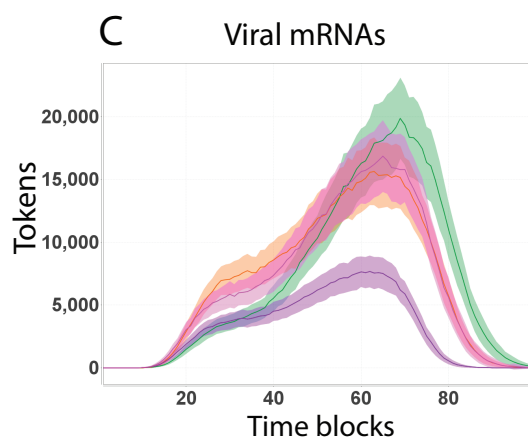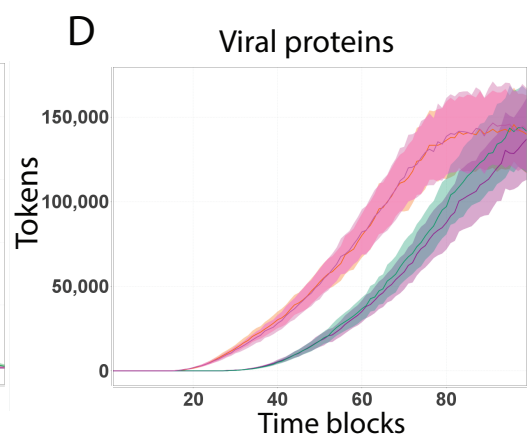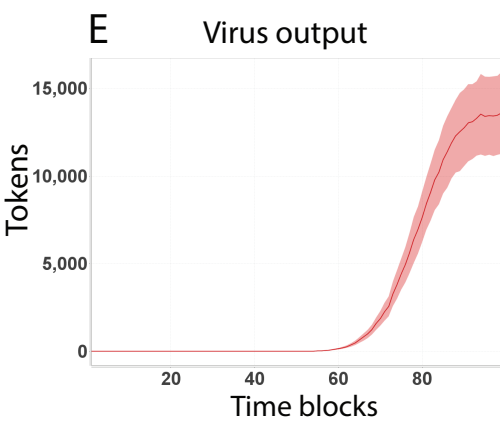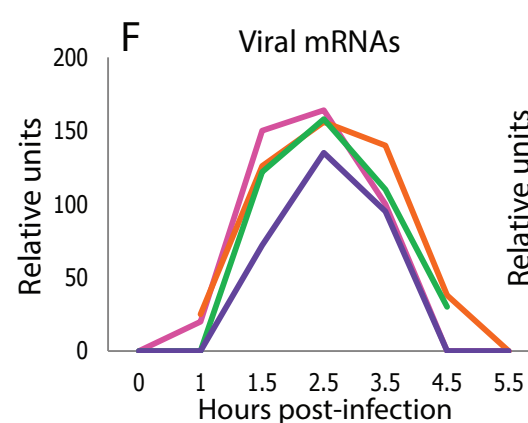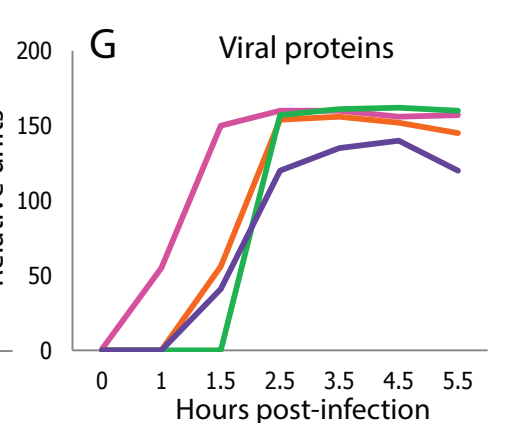

Supplement: pbio.1002530.s002.pdf [file pbio.1002530.s002.pdf]
